1                                   **Fecal microbial transplant abates tolerance**  
2                                   **to methylone-induced hyperthermia**

3           Robert Goldsmith<sup>1</sup>, Amal Aburahma<sup>1</sup>, Sudhan Pachhain<sup>2</sup>, Sayantan Roy Choudhury<sup>2</sup>, Vipa  
4           Phuntumart<sup>2</sup>, Ray Larsen<sup>2</sup>, Jon E. Sprague<sup>1</sup>

5  
6                                   <sup>1</sup>The Ohio Attorney General's Center for the Future of Forensic Science,

7                                   <sup>2</sup>The Department of Biological Sciences,

8                                   Bowling Green State University,

9                                   Bowling Green, OH 43403, USA

10  
11   Corresponding author:

12   Jon E. Sprague, PhD

13   BCI Eminent Scholar

14   Ohio Attorney General's Center for the Future of Forensic Science

15   Bowling Green State University

16   Bowling Green, OH 43403

17   Phone: +1-419-372-0224

18   e-mail: [jesprag@bgsu.edu](mailto:jesprag@bgsu.edu)

19  
20   **Competing Interest:** The authors have declared that no conflict of interest exists.

21  
22   Data can be made available upon request.

23

24

25

26

27

28

29

30

31

## 32 **Abstract**

33 The microbiome-gut-brain axis has been implicated in multiple bodily systems and pathologies,  
34 and intentional manipulation of the gut-microbiome has yielded clinically significant results.  
35 Here, we examined the effects of bi-directional fecal microbial transplants (FMT) between  
36 methylone-induced hyperthermic tolerant (MHT) and methylone-naïve (MN) rats. Rats treated  
37 with methylone once per week developed tolerance to methylone-induced hyperthermia by the  
38 fourth week. Once tolerant, daily bi-directional FMT between the two groups were performed for  
39 seven days prior to the next methylone treatment. The FMT abated the developed tolerance in the  
40 MHT group. When treated with methylone for the first time following FMT, recipient MN rats  
41 displayed significant tolerance to hyperthermia despite it being their initial drug treatment. Post-  
42 FMT, MHT rats displayed elevations in norepinephrine and expression of *UCP1*, *UCP3* and  
43 *TGR5* in brown adipose tissue, with reductions in expression of *TGR5* and *UCP3* in skeletal  
44 muscle. The pre- and post-FMT methylone tolerance phenotypes of transplant recipients are  
45 concurrent with changes in the relative abundance of several Classes of *Proteobacteria*, most  
46 evident for *Gammaproteobacter* and *Alphaproteobacter*. MHT recipients demonstrated a  
47 marked increase in the relative proportion of the *Firmicutes* Class *Erysipelotrichia*. These  
48 findings suggest that transplantation of gut-microbiomes can confer phenotypic responses to a  
49 drug.

50

51

52

53

54

55

## 56 **Introduction**

57 Use of the sympathomimetic agent methylone, the  $\beta$ -keto analog of 3,4-methylenedioxy-  
58 methamphetamine (MDMA), in warm ambient environments has been shown to induce an acute  
59 rise in body temperature [1], and fatal hyperthermia upon ingestion of methylone has been  
60 documented in case reports [2]. Hyperthermia mediated by sympathomimetic agents, such as  
61 MDMA and methylone, has both central and peripheral mechanisms. Centrally, activation of  
62 dopaminergic [3] and serotonergic [4] receptors in thermoregulatory circuits in the hypothalamus  
63 [5,6,7] contribute to the activation of the sympathetic nervous system (SNS). Peripherally,  
64 elevated levels of circulating norepinephrine acting at the  $\alpha_1$ -adrenergic receptor induce  
65 peripheral vasoconstriction, resulting in a decrease of heat dissipation [8]. Concurrently, activity  
66 of norepinephrine at the  $\beta_3$ -adrenergic receptor results in increases of free fatty acids and the  
67 activation of mitochondrial uncoupling proteins (UCP). These UCP enzymes then facilitate  
68 proton flux from the intermembrane space to the mitochondrial matrix in a manner that sheds the  
69 kinetic energy as heat instead of producing ATP, otherwise known as non-shivering  
70 thermogenesis [9]. Despite the neural pathways being well-documented, there is preliminary  
71 evidence of another contributor to the activation of sympathomimetic-induced thermogenesis:  
72 the microbiome [10].

73 Recent studies have demonstrated that the microbiome-gut-brain axis plays a major role  
74 in maintaining body temperature regulation [11, 12]. Li et al. [12] demonstrated that gut  
75 microbiome depletion as a result of treatment with multiple cocktails of antibiotics altered  
76 thermogenesis in mice exposed to cold environmental temperatures. The antibiotic treated mice  
77 displayed significantly lower core body temperatures at ambient room temperature, consistent  
78 with decreased *UCP1* gene expression in brown adipose tissue. Ridge et al. [10] demonstrated

79 that the administration of antibiotics for 14 days prior to MDMA treatment significantly reduced  
80 core body temperature increases, and blunted expression of *UCP1*, *UCP3* and the bile acid  
81 receptor gene *TGR5* (a regulator of UCP expression). These latter findings suggest a potential  
82 link between the microbiome-gut-brain axis and sympathomimetic-induced hyperthermia.

83 In addition to thermogenesis, the microbiome-gut-brain axis has become increasingly  
84 implicated in a variety of physiologies and conditions, including obesity, cancer, and  
85 neurodegenerative disorders such as Parkinson's Disease and Alzheimer's [13, 14, 15], and has  
86 quickly become a major target area in attempts to advance our understanding of the bacterial  
87 influence on health and disease. Naturally, researchers have begun to manipulate the microbiome  
88 in attempts to modulate these pathways and have begun to elucidate the communication between  
89 the gut, the brain, endocrine, and immune systems. To date, microbial manipulations have shown  
90 to effectively mitigate depressive symptoms in mice, demonstrating the ability to modulate mood  
91 through selective transfer of the microbiome [16]. In other medicinal areas, fecal microbial  
92 transplants (FMT) have been used to successfully treat inflammatory bowel disease [17] and  
93 *Clostridium difficile* infection [18], further establishing that the intentional manipulation of the  
94 gut microbiome can result in novel and clinically relevant outcomes. While previous experiments  
95 have indicated that microbial manipulations are capable of treating and inducing disease states,  
96 to date no analyses have been performed to explore the role they play in development of  
97 phenotypic responses such as drug-induced hyperthermia.

98 In the present study, we hypothesized that chronic exposure to methylone might drive changes in  
99 bacterial populations within the gastrointestinal tract that could contribute to the methylone  
100 hyperthermic tolerance development [19] shown in our previous work. If so, then transferring the  
101 microbiomes of methylone-induced hyperthermic tolerant rats to animals naïve to methylone

102 could replicate the tolerance effect in the absence of chronic drug exposure. Furthermore, we  
103 sought to discover whether the bi-directional transfer of methylone-naïve rat microbiomes to the  
104 tolerant rats would be sufficient to eliminate their developed hyperthermia tolerance to chronic  
105 methylone treatment.

## 106 **Materials and methods**

107 **Animals.** Adult, male (N=12, 275-300 g) Sprague-Dawley (*Rattus norvegicus domesticus*) rats  
108 were obtained from Envigo (Indianapolis, IN). Animals were housed one per cage (cage size:  
109 21.0 × 41.9 × 20.3 cm) and maintained on a 12:12 h light/dark schedule. To maximize the  
110 thermogenic response, animals were maintained at an ambient temperature of 25°C to 28°C and  
111 fed a minimum 10% fat diet [20,21]. Animals received food in the form of a ground powder in  
112 glass container in order to habituate them for fecal microbial transplant methods. Animal  
113 maintenance and research were conducted in accordance with the eighth edition of the Guide for  
114 the Care and Use of Laboratory Animals; as adopted and promulgated by the National Institutes  
115 of Health, with protocols approved by the Bowling Green State University Animal Care and Use  
116 Committee.

## 117 **Drug and Chemicals.**

118 Racemic methylone was obtained from Cayman Chemicals (Ann Arbor, MI) as a hydrochloride  
119 salt. On the day of the study, methylone solutions were made fresh at a concentration of 10  
120 mg/mL in 0.9% normal saline. All other chemicals and reagents were obtained from Sigma  
121 Chemical (St. Louis, MO).

122 **Induction of Hyperthermia Tolerance.** Male rats were randomly assigned into two groups of  
123 six (6) each, the first group being the treatment group and the second serving as the saline  
124 controls. On testing day, all subjects were weighed prior to drug challenge, and a core

125 temperature reading was taken with a rectal thermometer at time zero. On treatment days, the  
126 ambient temperature averaged  $27.4 \pm 0.12^{\circ}\text{C}$ . Following the first temperature measurement each  
127 week, the male treatment group received a 10 mg/kg subcutaneous (sc) dose of methylone, and  
128 the control group received an equal volume of saline solution (sc). Following drug challenge,  
129 core temperature readings were recorded at the 30-, 60- and 90-minute time points. This  
130 treatment schedule was maintained once a week for a total of four consecutive weeks, until the  
131 hyperthermic response of the methylone treatment group was statistically insignificant. Those  
132 animals treated weekly for four weeks with methylone were designated as methylone  
133 hyperthermic-tolerant (MHT) and those that received only saline for four weeks were designated  
134 methylone-naïve (MN).

135 **Fecal Microbial Transplant.** As mentioned previously, animals had up to this point become  
136 habituated to consuming ground food powder. To initiate fecal microbial transplant, cage fecal  
137 droppings from the weekly period directly prior to the hyperthermia-tolerant treatment were  
138 collected from each cage and pooled by MHT and MN groups. Droppings were ground into  
139 powder in a mortar and pestle and mixed in with food powder in a 15% (w/w) ratio according to  
140 previous literature [22]. Beginning the same day after the treatment in which methylone rats did  
141 not exhibit statistically significant hyperthermia, bi-directional FMT was conducted where each  
142 rat received *ab libitum* access to FMT food powder of alternate group. This feeding schedule  
143 continued every day for 7 days until the next methylone treatment schedule. Food consumption  
144 was monitored daily.

145       Upon final treatment day (seven days from previous methylone dose during which FMT  
146 was administered daily), all 12 rats received methylone treatment at 10 mg/kg and temperature  
147 measurements were recorded as explained previously. After 90-minutes, rats were euthanized

148 with CO<sub>2</sub> and cardiac punctures were performed to collect blood samples. Plasma samples were  
149 stored at -20°C. BAT and SKM, namely the gastrocnemius, were removed and flash frozen with  
150 liquid nitrogen, before being stored at -80°C.

151 **RNA isolation and qRT-PCR.** Total RNA was purified from homogenized SKM and BAT  
152 tissues using PureZOL™ RNA Isolation reagent (BioRad, CA) as described [23,24]. RNA  
153 concentration and quality were determined using a NanoDrop Spectrophotometer (Thermo, MI)  
154 and by 1% agarose gel electrophoresis, respectively. Reverse transcription reactions were  
155 performed to synthesize cDNA from 200 ng of total RNA using the iScript™ Select cDNA  
156 Synthesis Kit (Biorad, CA). Real-time quantitative PCR (qRT-PCR) was carried out in the CFX  
157 Connect Real-Time PCR Detection System (Biorad, CA) using iTaq™ universal SYBR® Green  
158 supermix (Biorad, CA). The PCR parameters were as previously described [10,19].

159 Quantification cycle (Cq) values for all genes were compared and analyzed by using the  $\Delta\Delta C(t)$   
160 method [25]. All primer pairs used for the analysis of *UCPI*, *UCP3*, *TGR5*, and actin were as  
161 described [10]. Beta-actin was used as a reference gene.

162 **High Performance Liquid Chromatography-Electrochemical Detection (HPLC-EC).** The  
163 plasma samples collected from each rat were purified and norepinephrine (NE) was extracted  
164 according to the combined methods of Denfeld et al [26] and Holmes et al [27]. After extraction,  
165 NE levels were assessed using HPLC-EC (Shimadzu, Canby, OR). The mobile phase consisted  
166 of 14% methanol, and an 86% mixture of 0.05 M phosphate, 0.03 M citric acid buffer, 0.6 mM  
167 octasulfonic acid, and 1.0 mM EDTA-disodium. The pump flow rate was 0.55 ml/min and was  
168 set to an operating temperature of 30 °C. NE was separated using a PP-ODS II reverse phase  
169 C18-column (Shimadzu, Columbia, MD) and identified according to the retention time of the  
170 standard, and concentrations were quantified by comparison with peak heights of the standard

171 concentration curve ( $10^4$ - $10^8$  pg/ $\mu$ L). The quantification of sample NE concentrations was  
172 performed using an Epsilon electrochemical (EC) detector connected to the HPLC. The detector  
173 sensitivity was 5 uA and the oxidation potential was fixed at +700 mV using a glassy carbon  
174 working electrode versus an Ag/AgCl reference electrode. Lab Solution software was used to  
175 integrate and analyze the raw data for determination of norepinephrine levels.

176 **16S rRNA Gene Analysis.** Once tolerance to methylone-induced hyperthermia was displayed  
177 (4<sup>th</sup> week of treatment), one day before FMT, daily fecal dropping collection was initiated. This  
178 was considered day 0 which was one day prior to the initiation of FMT. During the 7 days of  
179 FMT, individual animal fecal droppings were collected, and the cages changed. On the 7<sup>th</sup> day of  
180 FMT, fecal droppings were collected (day 7) followed by treatment with methylone. Collected  
181 feces were stored at -70°C.

182 Isolation of DNA from fecal droppings was performed using a DNeasy Powersoil Kit  
183 (Qiagen Inc., CA). The concentration and quality of the DNA were determined using a  
184 NanoDrop Spectrophotometer (Thermo, MI) and by 0.8% agarose gel electrophoresis,  
185 respectively.

186 Isolated DNA samples were submitted to LC Sciences (Houston, TX) for standard  
187 metagenomic analysis, using primers (341F/805R) that amplify an ~465 bp region containing  
188 the V3 and V4 regions of the 16S rRNA gene. The amplified library was sequenced on a  
189 NovaSeq platform as paired-end reads (2x250 bp). The resultant raw data were processed by LC  
190 Sciences, using a Divisive Amplicon Denoising Algorithm (DADA2)(35), followed by  
191 construction of Operational Taxonomic Units (OUT)[24].

192 **Statistical Analysis.** GraphPad InStat v.6.0 software was used to complete all statistical analyses  
193 of data except the metagenomic data set. The results are presented as the mean  $\pm$  SEM of the



194 rectal core body temperatures of the treatment/control groups. Within treatment group changes in  
195 body temperature over time were compared with a one-way ANOVA followed by a Dunnett's  
196 post-hoc test. When only two groups were compared, a two-tailed t-test was performed.  
197 Significance was established at  $p < 0.05$  a priori.

198 Linear regression and correlation coefficients were determined by plotting individual data  
199 points for each subject within the MHT and MN groups ( $n = 6$ ) for maximal change in  
200 temperature following methylone administration and NE levels. The linearity of relationships  
201 between plasma NE and maximal change in temperature were determined by linear regression  
202 analysis. Statistical significance was determined using a linear relationship ANOVA test.

## 203 **Results**

204 **Methylone-induced changes in body temperature.** A two-tailed t-test of maximal temperature  
205 change comparing MHT and MN controls yielded a significant hyperthermic effect ( $p = 0.004$ )  
206 on the first week of treatment (Figure 1A). In the second week, significant hyperthermia was  
207 again achieved in the MHT group compared to MN controls ( $p = 0.0001$ ). By week three,  
208 hyperthermia was still achieved by MHT rats ( $p = 0.001$ ) compared to maximal temperature  
209 change in the MN group. A one-way ANOVA with Dunnett's post-hoc test within the MHT  
210 group over the five-week treatment period demonstrated no difference in the rise in body  
211 temperature between weeks 1 and 2 ( $p = 0.79$ ); a significantly lower hyperthermic response ( $p =$   
212  $0.04$ ) was seen at week three compared week 1. By the fourth week, the hyperthermic response  
213 was lost in the MHT group and the temperature did not differ from the MN group ( $p = 0.881$ ).  
214 Throughout the first four weeks of treatment, saline injections did not have an effect on body  
215 temperature in the MN group when compared back to the first week of treatment.

216           Following FMT between weeks four and five, MHT rats exhibited a complete loss of  
217 tolerance to methylone-induced hyperthermia, yielding a substantially increased maximal  
218 temperature change ( $p = 0.0001$ ) compared to the previous week where total tolerance was seen.  
219 A one-way ANOVA with Dunnett's post-hoc test comparing week five to week one baseline  
220 when the original methylone dose was administered demonstrated that the tolerance effect was  
221 lost, and that hyperthermia had returned in the MHT group. The MN group, who received their  
222 first dose of methylone at week 5 following the FMT, did not display a significant change in  
223 temperature following methylone treatment ( $p = 0.29$ ).

224 **Methylone-induced changes in plasma norepinephrine levels.** Plasma samples obtained from  
225 both treatment groups showed significant increases in circulating norepinephrine levels 90  
226 minutes after methylone (Figure 1B). MN rats that received FMT from MHT rats had lower  
227 plasma norepinephrine levels than the corresponding MHT rats that received FMT from the MN  
228 animals. Linear regression analysis was performed to compare each animal's norepinephrine  
229 level and the maximal change in temperature induced by methylone. The results demonstrated a  
230 significant relationship between plasma levels of norepinephrine and maximal temperature  
231 change (Figure 1C).

232 **Expression of genes involved in methylone stimulation are modulated by FMT.** For brown  
233 adipose tissues (BAT), qRT-PCR demonstrated a 43-fold increase in the expression of *TGR5* in  
234 the MHT group relative to the MN group (Figure 2A). The expression of *UCPI* and *UCP3* (1.48-  
235 and 1.38-fold, respectively) was also observed for MHT group relative to that of MN group.  
236 Conversely, in skeletal muscle (SKM), both *TGR5* and *UCP3* gene expression was decreased by  
237 5- and 2.5-fold, respectively in MHT group (Figure 2B). Expression of *UCPI* in SKM was  
238 below the level of detection.

239 **Fecal microbiome composition changes associated with FMT.** While fecal samples were  
240 collected for all animals before and after FMT, not all samples yielded high quality DNA, as  
241 defined by DNA concentration and genome integrity as evidenced by development on 0.8%  
242 agarose gels (data not shown). Therefore, we limited microbiome comparisons to six animals  
243 (three MHT, and three MN) for which high quality DNA had been isolated both prior to (day 0)  
244 and following (day 7) FMT.

245 Principal coordinates analysis (PCoA) identified MN and MHT animals as having  
246 distinct fecal microbiomes, with greater intra-group similarity in the MHT group than in the MN  
247 group (Figure 3). Taxonomic comparisons at the Phylum level indicated that for both MN and  
248 MHT animals, ~80% of the fecal microbiota taxa consisted of *Firmicutes* (~60%) and  
249 *Bacteroidetes* (20%), with the *Proteobacteria* a distant third at 1-6% (Figure 4A). Taxonomic  
250 comparisons at the Class level provided greater resolution, with changes in several taxa evident  
251 following FMT. MHT recipients demonstrated a marked increase in the relative proportion of  
252 the *Firmicutes* Class *Erysipelotrichia*, whereas the reciprocal transplant did not significantly alter  
253 *Erysipelotrichia* levels in MN recipients (Fig 4B, Table 1). Notably, the relative proportion of  
254 *Erysipelotrichia* was four-fold less in the MHT group than in the MN group. Conversely, for the  
255 *Proteobacteria* Classes *Gammaproteobacter* and *Alphaproteobacter*, relative proportions were  
256 similar between MHT and MN animals prior to transplant but increased several folds in each of  
257 the MN animal recipients following FMT from MHT donors. In the reciprocal transplants, the  
258 relative abundance of *Gammaproteobacter* remained similar for two of the three MHT  
259 recipients, with the third recipient showing a multifold increase in the relative abundance of  
260 *Gammaproteobacter* (Fig 4B, MHT6, Table 1). Similarly, *Alphaproteobacter* displayed multi-  
261 fold increases in each of the three MN animal recipients following FMT, and little change for

262 two of the three MHT recipients, again with same animal showing a several-fold increase  
263 following FMT from the MN donor (Fig 4B, MHT6; Table 1).

264

265 Table 1. Mean relative percentage of microbiota as the Class *Erysipelotrichia*,  
266 *Gammaproteobacteria* and *Alphaproteobacteria* pre- (day 0) and post- (day 7) FMT  
267

| Class & Day                | MHT                         | MN                         |
|----------------------------|-----------------------------|----------------------------|
| <i>Erysipelotrichia</i>    |                             |                            |
| Day 0                      | 0.07 ± 0.037                | 0.30 ± 0.120               |
| Day 7                      | 0.70 ± 0.120 <sup>a,b</sup> | 0.24 ± 0.058               |
| <i>Gammaproteobacteria</i> |                             |                            |
| Day 0                      | 0.58 ± 0.084                | 0.60 ± 0.075               |
| Day 7                      | 1.22 ± 0.561 <sup>a</sup>   | 2.236 ± 0.432 <sup>c</sup> |
| <i>Alphaproteobacteria</i> |                             |                            |
| Day 0                      | 0.43 ± 0.094                | 0.30 ± 0.114               |
| Day 7                      | 0.56 ± 0.120                | 3.12 ± 0.531 <sup>d</sup>  |

268 <sup>a</sup>indicates significantly different than MHT day 0 (p < 0.05)

269 <sup>b</sup>indicates significantly different than MN day 7 (p<0.05).

270 <sup>c</sup>indicates significantly different than MN day 0 (p<0.05).

271 <sup>d</sup>indicates significantly different than all other groups (p<0.001).

272 Each value is the mean ± SEM (n=3).

273

## 274 Discussion

275 Here, we demonstrate for the first time that FMT can influence the temperature response changes  
276 induced by sympathomimetic agents such as methylone. By the fourth week of treatment,  
277 tolerance to the drug-induced hyperthermia had developed. Following FMT between weeks four  
278 and five, MHT rats exhibited a complete loss of tolerance to methylone-induced hyperthermia,  
279 yielding a substantially increased maximal temperature change compared to the previous week  
280 where total tolerance was observed. Moreover, the MN group who received their first methylone  
281 treatment and would normally be expected to experience significant increases in body

282 temperature, displayed no significant change in temperature after receiving the FMT from MHT  
283 donors. These findings are consistent with a previous study that suggested the potential link  
284 between sympathomimetic-induced thermogenesis and gut bacteria [10], and strikingly, provided  
285 evidence that the FMT is capable of modulating the thermogenic response. To our knowledge,  
286 these results appear to be the first evidence to demonstrate that a pharmacologically mediated  
287 temperature response to a drug can be reproduced from donor to recipient through fecal  
288 microbial transplant in an animal model. In this case, based on the norepinephrine differences  
289 between the treatment groups, FMT had a substantial influence on the sympathetic nervous  
290 system and introduced a tolerance effect to the drug naïve group that would otherwise only occur  
291 in subjects that had been repeatedly exposed to the drug.

292         The restoration of methylone-induced hyperthermia in the MHT group was associated  
293 with a significant increase in plasma norepinephrine levels as compared to the MN group which  
294 did not display a hyperthermic response. The gut-microbiota has been shown to produce  
295 catecholamines [28], and norepinephrine has been suggested to play a key communication role in  
296 the microbiome-gut-brain axis. Additionally, exogenously administered norepinephrine can  
297 induce *Escherichia coli* chemotaxis, motility, and virulent gene expression [29] through binding  
298 to the bacterial norepinephrine-like receptor, QseC [30]. Given that sympathomimetic agents can  
299 increase plasma norepinephrine up to 35-fold [31], it is not surprising that these agents can  
300 influence the gut microbiome and vice versa.

301         UCP1 and UCP3 have further been demonstrated to play complementary roles in the  
302 onset (UCP1) and maintenance (UCP3) of sympathomimetic-induced hyperthermia [32]. We  
303 have previously demonstrated that in male rats, tolerance to methylone-induced hyperthermia  
304 occurs between the fourth and fifth weeks following once a week treatment [19]. In that study,

305 the gene expression levels for *UCP1*, *UCP3* and *TGR5* were also measured in brown adipose  
306 tissue (BAT) and skeletal muscle (SKM). Tolerance was associated with an increase in *UCP3* in  
307 BAT and increases in *UCP1* and *UCP3* in skeletal muscle [19]. Here, following FMT, BAT  
308 demonstrated an increase in the expression of *TGR5*, *UCP1*, and *UCP3* in the MHT group  
309 relative to the MN group. Conversely, in SKM, both *TGR5* and *UCP3* gene expression was  
310 decreased in the MHT group. These changes are consistent with the key roles UCPs play in  
311 mediating sympathomimetic hyperthermia and the restoration of the hyperthermic response  
312 following FMT in the MHT treatment group.

313         Previously, a hyperthermic dose of MDMA was shown to lead to the enrichment of the  
314 relative proportion of a *Proteus mirabilis* strain in the ceca [10]. In that same study, antibiotic  
315 treatment not only prevented the *Proteus mirabilis* enrichment but also attenuated MDMA-  
316 induced hyperthermia. Angoa-Perez et al., [33] examined the effects of synthetic cathinones on  
317 the diversity and taxonomic structure of the gut microbiome. Those authors found that the two  
318 phyla most altered by the synthetic cathinones were *Firmicutes* and *Bacteroidetes*. Similarly, in  
319 the present study, taxonomic comparisons at the Phylum level indicated that for both MN and  
320 MHT animals the greatest effects were also on *Firmicutes* and *Bacteroidetes*. As noted by  
321 Angoa-Perez et al., [33], this effect on *Firmicutes* and *Bacteroidetes* is expected as these two  
322 phyla are dominant in rodents [33]. The specific identity of the microbe(s) involved in the  
323 present temperature changes is unknown due to insufficient resolving power of 16S rRNA gene  
324 alone; however, the concordance of changes in the relative abundance of *Gammaproteobacter*  
325 and *Alphaproteobacter* following FMT implicates members of these two phyla as potential  
326 contributors to the establishment of methylergine tolerance. The lower relative abundance of

327 *Erysipelotrichia* in MHT animals, and its increase following FMT similarly implicates this  
328 phylum as a potential contributor.

329         There are a number of critical considerations to be made in the interpretation of these  
330 data. While the roles that clinical and recreational agents have in contributing to dysbiosis of the  
331 microbiome have just begun to be characterized and the overall effects appear to be compound  
332 specific, there is often significant individual variation between microbe communities in test  
333 subjects [34, 35], complicating the interpretation of the changes induced by the drugs. Based  
334 upon our experiments, we do not know whether methylone itself is directly mediating changes to  
335 the microbiome or if these changes are indirect and secondary to a pharmacodynamic response  
336 (e.g., hyperthermia) to the drug. Although the findings in the present study suggest a link  
337 between the gut-brain axis and sympathomimetic-induced hyperthermia, the gut microbiome  
338 changes may also be playing a peripheral role in altering the thermogenesis mediated by  
339 methylone. Finally, the use of FMT may have selected for aerobic or facultative anaerobic taxa  
340 which may be reflected in our post-FMT taxonomic differences.

### 341 **Conclusion**

342         The bi-directional FMT between MHT and MN resulted in a complete reversal of the  
343 predicted hyperthermic response in the MN group. After displaying tolerance to the  
344 hyperthermia mediated by methylone, the FMT from MN to MHT resulted in a return of  
345 hyperthermia in animals that over a four-week treatment period continued to display resistance.  
346 Given that the gut microbiota has been demonstrated to impact thermoregulation in general [12],  
347 the results from the present study further support the contention that the gut microbiome plays a  
348 contributing role in the hyperthermia mediated by sympathomimetic agents such as methylone,

349 and that fecal microbial transplants may be able to transfer phenotypic responses to  
350 pharmacological agents.

351

352



## 353 **References**

- 354 1. Grecco GG & Sprague JE (2016) Impact of functional group modifications on designer  
355 phenethylamine induced hyperthermia. *Chem Res Toxicol* 29: 871-878.
- 356 2. Borek HA & Holstege CP (2012) Hyperthermia and multiorgan failure after abuse of “bath  
357 salts” 253 containing 3,4-methylenedioxypropylvalerone. *Ann Emerg Med* 60: 103-105.
- 358 3. Mechan AO, Esteban B, O'Shea E, Elliott JM, Colado MI & Green AR (2002) The  
359 pharmacology of the acute hyperthermic response that follows administration of 3,4-methylene-  
360 dioxymethamphetamine (MDMA, 'ecstasy') to rats. *Br J Pharmacol* 135: 170-180.
- 361 4. Herin DV, Liu S, Ullrich T, Rice KC & Cunningham KA (2005) Role of the serotonin 5-  
362 HT2A receptor in the hyperlocomotive and hyperthermic effects of (+)-3,4-methylenedioxy-  
363 methamphetamine. *Psychopharmacol (Berl)* 178: 505-513.
- 364 5. Rusyniak DE & Sprague JE (2005) Toxin-induced hyperthermic syndromes. *Med Clin N Am*  
365 89: 1277-1296.
- 366 6. Hargreaves GA, Hunt GE, Cornish JL & McGregor IS (2007) High ambient temperature  
367 increases 3,4-methylenedioxyamphetamine (MDMA, "ecstasy")-induced Fos expression in  
368 a region-specific manner. *Neurosci* 145: 764-774.
- 369 7. Benamar K, Geller EB & Adler MW (2008) A new brain area affected by 3,4-methylene-  
370 dioxymethamphetamine: A microdialysis-biotelemetry study. *Eur J Pharmacol* 596: 84-88.
- 371 8. Pedersen NP & Blessing WW (2001) Cutaneous vasoconstriction contributes to hyperthermia  
372 induced by 3,4-methylenedioxyamphetamine (Ecstasy) in conscious rabbits. *J Neurosci* 21:  
373 8648–8654.
- 374 9. Cannon B & Nedergaard J (2004) Brown adipose tissue: function and physiological  
375 significance. *Physiol Rev* 84: 277-359.
- 376 10. Ridge EA, Pachhain S, Choudhury SR, Bodnar SR, Larsen RA Phuntumart V & Sprague JE  
377 (2019). The influence of the host microbiome on 3,4-methylenedioxyamphetamine  
378 (MDMA)-induced hyperthermia and vice versa. *Scientific Rep* 9: 4313.
- 379 11. Rosenbaum M, Knight R & Leibel RL (2015) The Gut Microbiota in Human Energy  
380 Homeostasis and Obesity. *Trends Endocrinol Metab* 26: 493–501.
- 381 12. Li B, Li LM, Lam SM, Wang G, Wu Y, Zhang H, Niu C, Zhang X, Liu X, Hambly C, Jin  
382 W, Shui G & Speakman JR (2019) Microbiota depletion impairs thermogenesis of brown  
383 adipose tissue and browning of white adipose tissue. *Cell Rep* 26: 2720-2737.e5.

- 384 13. Maruvada P, Leone V, Kaplan LM & Chang EB (2017) The Human Microbiome and  
385 Obesity: Moving beyond Associations. *Cell Host & Microbe* 22: 589–599.
- 386 14. Rajagopala SV, Vashee S, Oldfield LM, Suzuki Y, Venter JC, Telenti A & Nelson KE  
387 (2017) The Human Microbiome and Cancer. *Cancer Prevention Res* 10: 226–234.
- 388 15. Ghaisas S, Maher J & Kanthasamy A (2016) Gut microbiome in health and disease: Linking  
389 the microbiome-gut-brain axis and environmental factors in the pathogenesis of systemic and  
390 neurodegenerative diseases. *Pharmacol Therapeutics* 158: 52–62.
- 391 16. Zhang Y, Huang R, Cheng M, Wang L, Chao J, Li J, Zheng P, Xie P, Zhang Z & Yao H  
392 (2019) Gut microbiota from NLRP3-deficient mice ameliorates depressive-like behaviors by  
393 regulating astrocyte dysfunction via circHIPK2. *Microbiome* 7: 116-131.
- 394 17. Wang AY, Popov J & Pai N (2016) Fecal microbial transplant for the treatment of pediatric  
395 inflammatory bowel disease. *World J Gastroenterol* 22: 10304–10315.
- 396 18. Liubakka A & Vaughn BP (2016) *Clostridium difficile* infection and fecal microbiota  
397 transplant. *AACN Advanced Critical Care* 27: 324–337.
- 398 19. Goldsmith RS, Pachhain S, Choudhury SR, Phuntumart V, Larsen R & Sprague JE (2019)  
399 Gender differences in tolerance to the hyperthermia mediated by the synthetic cathinone  
400 methylone. *Temperature* 6: 334-340.
- 401 20. Dafters RI (1994) Effect of ambient temperature on hyperthermia and hyperkinesis induced  
402 by 3,4-methylenedioxymethamphetamine (MDMA or "ecstasy") in rats. *Psychopharmacology*  
403 (Berl) 114: 505-508.
- 404 21. Mills EM, Weaver KL, Abramson E, Pfeiffer M & Sprague JE (2007) Influence of dietary  
405 fats on ecstasy-induced hyperthermia. *Br J Pharmacol* 151: 1103-1108.
- 406 22. Kohl KD, Weiss, RB, Cox J, Dale C & Dearing MD (2014) Gut microbes of mammalian  
407 herbivores facilitate intake of plant toxins. *Ecol Lett* 17: 1238-1246.
- 408 23. Callahan BJ, McMurdie PJ, Rosen MJ, Han AW, Johnson AJ & Holmes SP (2016) DADA2:  
409 High-resolution sample inference from Illumina amplicon data. *J Nat Methods* 13: 581-3.
- 410 24. Blaxter M, Mann J, Chapman T, Thomas F, Whitton C, Floyd R & Abebe E (2005) Defining  
411 operational taxonomic units using DNA barcode data. *Phil Trans Royal Soc London Series B,*  
412 *Biol Sci* 360: 1935-1943.
- 413  
414 25. Livak KJ & Schmittgen TD (2001) Analysis of relative gene expression data using real-time  
415 quantitative PCR and the 2–  $\Delta\Delta$ CT method. *Methods* 25: 402-408.
- 416

- 417 26. Denfeld QE, Habecker BA & Woodward WR (2018) Measurement of plasma  
418 norepinephrine and 3,4-dihydroxyphenylglycol: method development for a translational research  
419 study. BMC Res Notes 11: 248.
- 420 27. Holmes C, Eisenhofer G & Goldstein DS (1994) Improved assay for plasma  
421 dihydroxyphenylacetic acid and other catechols using high-performance liquid chromatography  
422 with electrochemical detection. J Chromatogr B Biomed Appl 653: 131-138.
- 423 28. Asano Y, Hiramoto T, Nishino R, Aiba Y, Kimura T, Yoshihara K, Koga Y & Sudo, N  
424 (2012) Critical role of gut microbiota in the production of biologically active, free  
425 catecholamines in the gut lumen of mice. Am J Physiol Gastrointest Liver Physiol 303: G1288-  
426 95.
- 427 29. Bansal T, Englert D, Lee J, Hegde M, Wood TK & Jayaraman A (2007) Differential effects  
428 of epinephrine, norepinephrine, and indole on *Escherichia coli* O157:H7 chemotaxis,  
429 colonization, and gene expression. Infect Immun 75: 4597-4607.
- 430 30. Clarke MB, Hughes DT, Zhu C, Boedeker EC, & Sperandio V (2006) The QseC sensor  
431 kinase: a bacterial adrenergic receptor. Proc Natl Acad Sci USA 103: 10420–10425.  
432
- 433 31. Sprague JE, Moze P, Caden D, Rusyniak DE, Holmes C, Goldstein,DS & Mills EM (2005)  
434 Carvedilol reverses hyperthermia and attenuates rhabdomyolysis induced by 3,4-methylene-  
435 dioxymethamphetamine (MDMA, Ecstasy) in an animal model. Crit Care Med 33: 1311-1316.
- 436 32. Riley CL, Dao C, Kenaston MA, Muto L, Kohno S, Nowinski SM, Solmonson AD, Pfeiffer  
437 M, Sack MN, Lu Z, Fiermonte G, Sprague JE & Mills EM (2016) The complementary and  
438 divergent roles of uncoupling proteins 1 and 3 in thermoregulation. J Physiol 594: 7455-7464.
- 439 33. Angoa-Perez M, Zagorac B, Winters AD, Greenberg JM, Ahmad M, Theis KR & Kuhn DM  
440 (2020) Differential effects of synthetic psychoactive cathinones and amphetamine stimulants on  
441 the gut microbiome in mice. PLoS One 15: e0227774.
- 442 34. Human Microbiome Project Consortium (2012) Structure, function and diversity 28of the  
443 healthy human microbiome. Nature 486: 207–214.
- 444 35. Franklin CL& Ericsson AC (2017) Microbiota and reproducibility of rodent models. Lab  
445 Anim (NY) 46: 114-122.

446

447

448

## 449 **Funding**

450 This study was funded in part by an internal grant from the Ohio Attorney General's Center for  
451 the Future of Forensic Science.

## 452 **Figure Legends:**

453 **Figure 1.** Maximal temperature and norepinephrine (NE) changes associated with once-a-week  
454 dosing of methylone (10 mg/kg, sc). **(A)** Weekly maximal temperature changes. "FMT" bar  
455 between weeks four and five indicates the duration of the fecal microbial transplant between  
456 treatments. \*indicates significant difference between each week's maximal temperature change  
457 between the MHT and MN group ( $p < 0.004$ ).  $\phi$  indicates significantly different from MHT  
458 maximal temperature change week 1 ( $p < 0.04$ ). **(B)** NE plasma concentrations (pg/ $\mu$ L) for MHT  
459 and MN rats following the 5<sup>th</sup> week of treatment with methylone (10 mg/kg, sc). Each value is  
460 the average  $\pm$  SEM ( $n=6$ ). \*indicates significant differences from MHT group ( $p = 0.008$ ). **(C)**  
461 Linear correlation between NE levels and maximal temperature changes following methylone  
462 treatment. Significance as determined by linear regression ANOVA analysis is shown, along  
463 with the correlation coefficients.

464 **Figure 2.** **(A)** Relative fold changes in gene expression of *TGR5*, *UCP1* and *UCP3* by qRT-PCR  
465 of MHT group compared to MN group in brown adipose tissue (BAT) and **(B)** in the skeletal  
466 muscle (SKM). Expression of UCP1 in SKM was below the level of detection. Each bar  
467 represents the mean  $\pm$  SEM of three samples performed in triplicate.

468

469 **Figure 3.** Principal coordinate analysis (weighted, unfractionated) of overall microbiome  
470 composition pre- and post-FMT. Colored circles represent the microbiome of an individual at  
471 the 95% confidence interval, with the group membership identified by color, as indicated in the  
472 key, where; “MN day 0” (orange circles) represents untreated control animals prior to FMT,  
473 “MN day 7” (green circles) represents untreated control animals following to FMT, “MHT day  
474 0” (blue circles) represents methylene tolerant animals prior to FMT and “MHT day 7” (purple  
475 circles) represents methylene tolerant animals following to FMT.  $p = 0.019$ .

476 **Figure 4.** (A) The relative abundance of the 30 most common bacterial Classes identified for  
477 individual animals prior to (“0”) and following (“7”) FMT are depicted as stacked bars, with  
478 individual Classes identified by color, as indicated by the key at the right. Methylene  
479 hyperthermia-tolerant (MHT) and methylene-naive (MN) animals are identified by number. (B)  
480 The upper 10% of Fig 5b; vertically stretched 10x to allow comparison of less prevalent Classes  
481 pre- and post-FMT. Changes in the relative number of *Gammaproteobacteria* (light blue) and  
482 *Alphaproteobacteria* (light purple) are highlighted by dotted lines between the pre-FMT (“0”) and  
483 post-FMT (“7”) stacks for each animal. Boxes corresponding to *Erysipelotrichia* (pale  
484 yellow) are highlighted as “\*”.

485

Figure 1

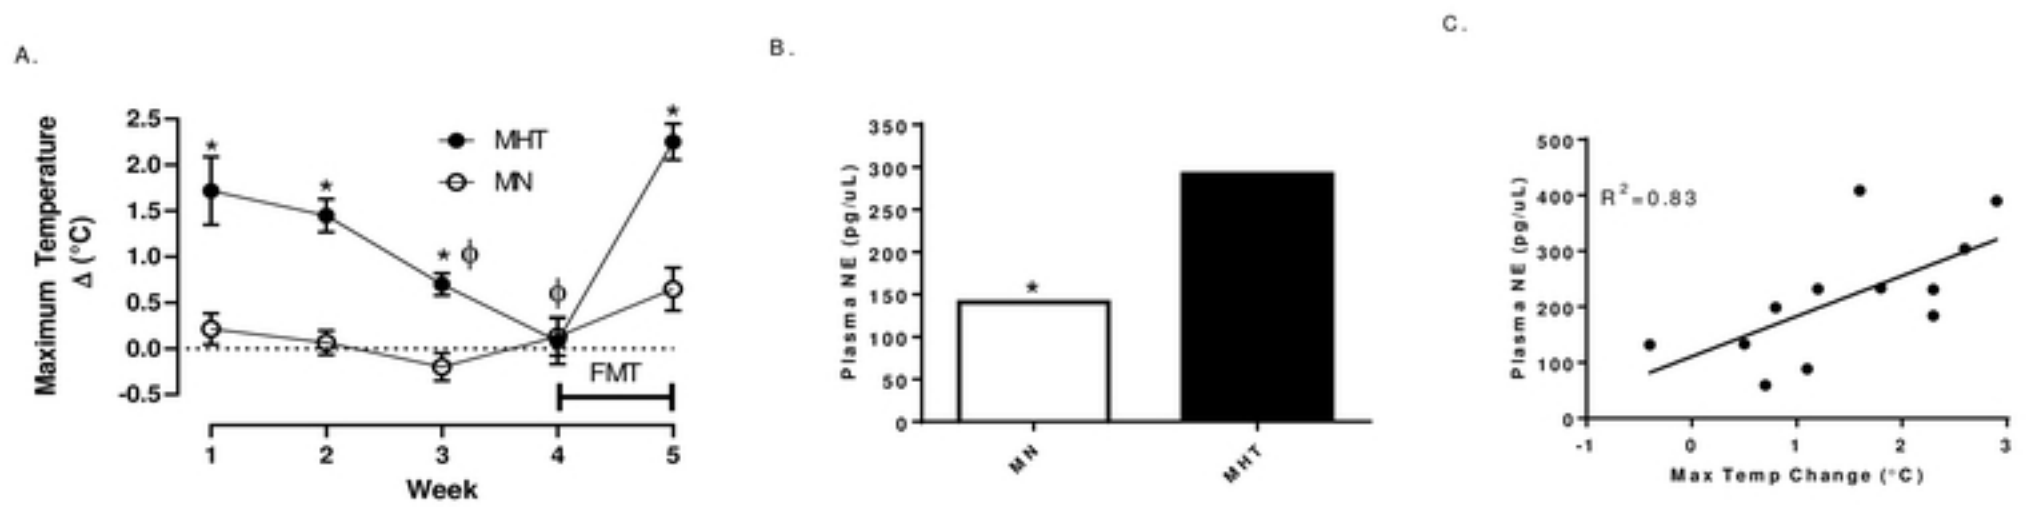

Figure 1

Figure 2

A. BAT

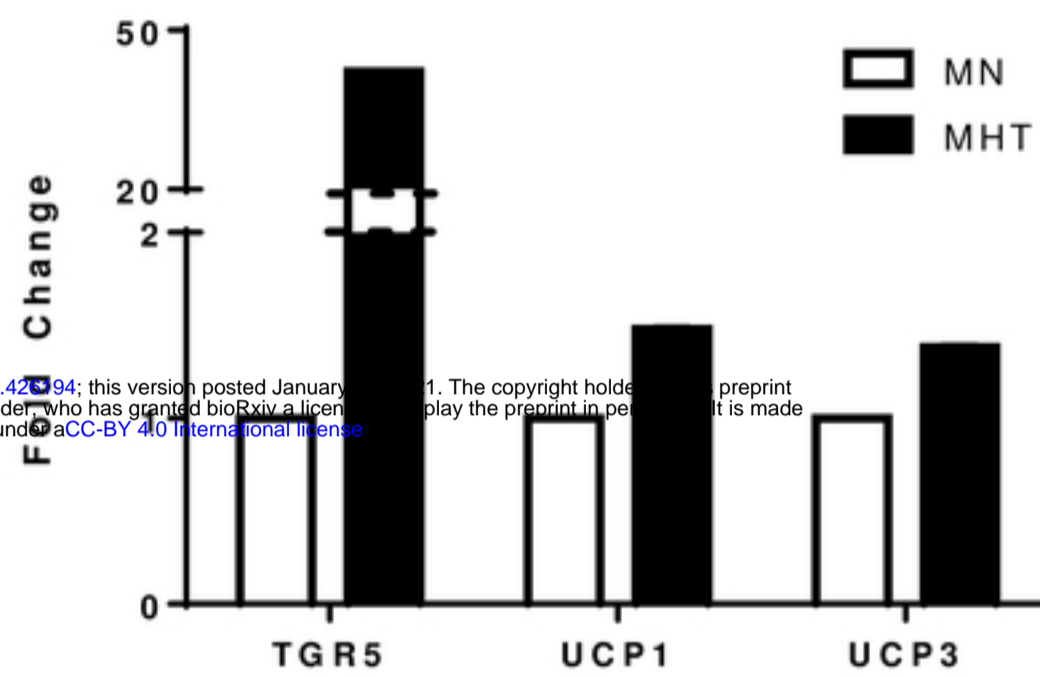

B. SKM

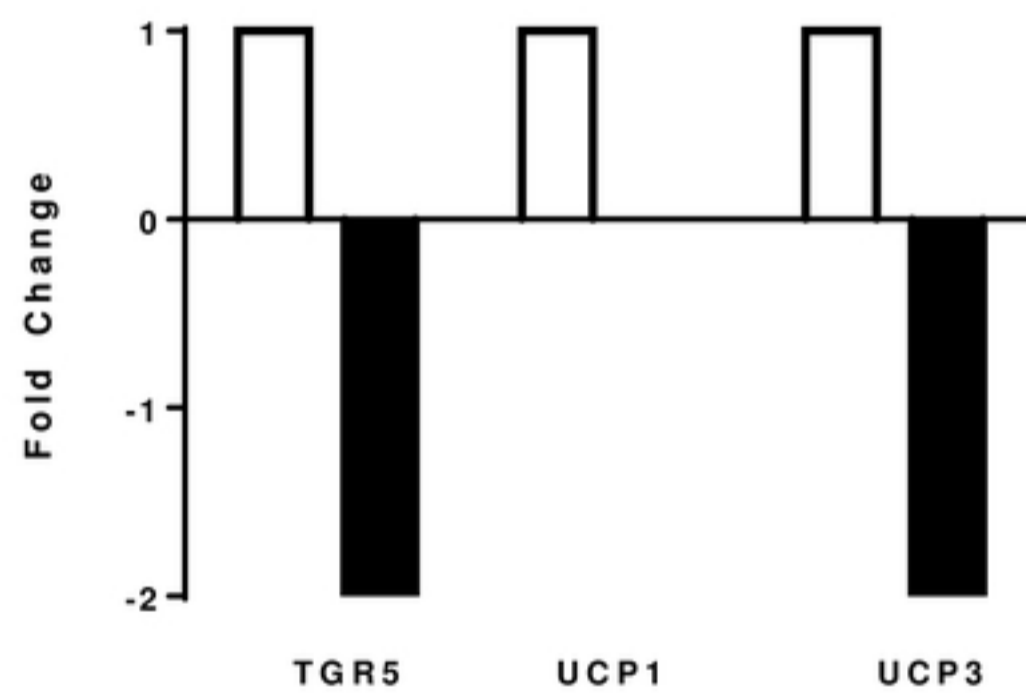

Figure 3

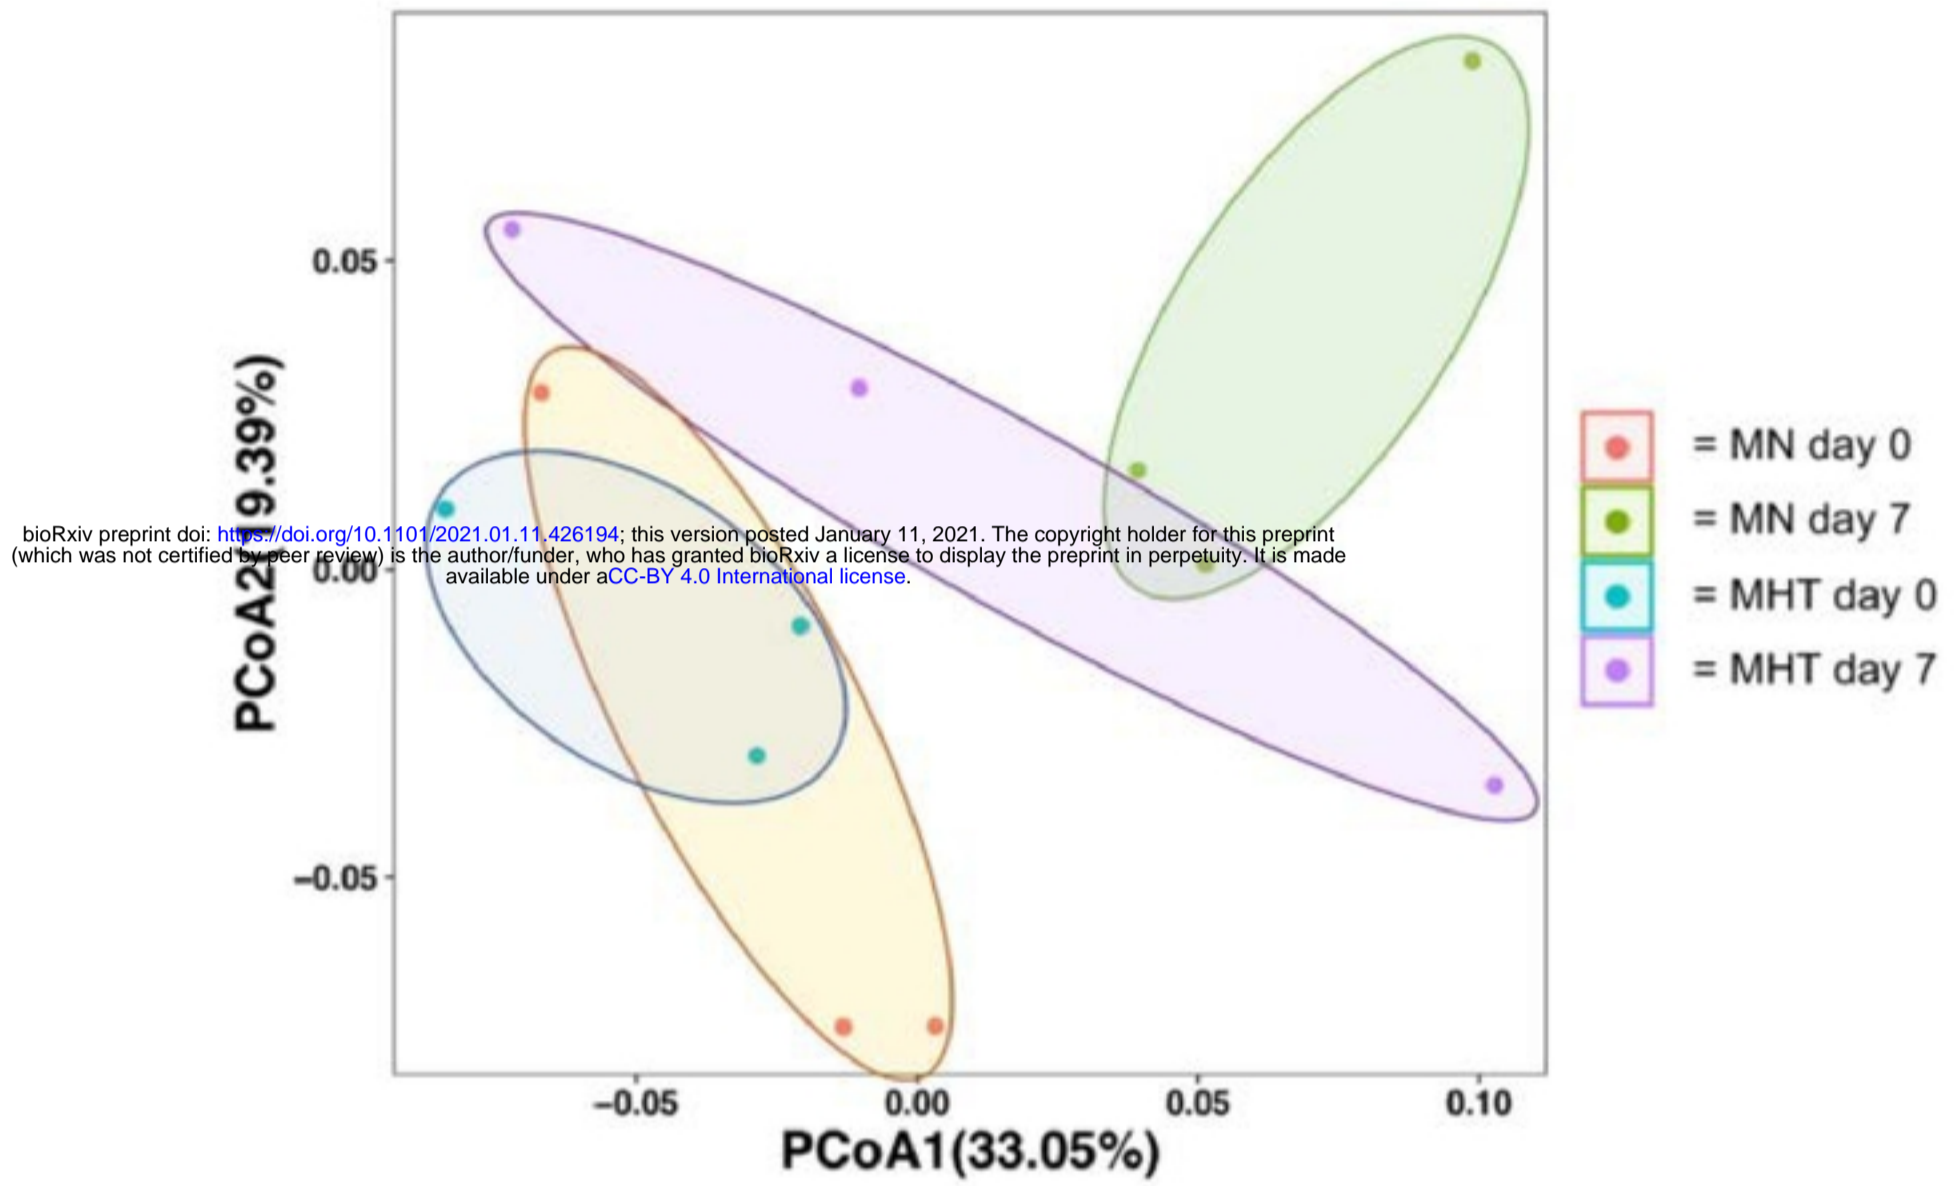



Figure 4

**A**

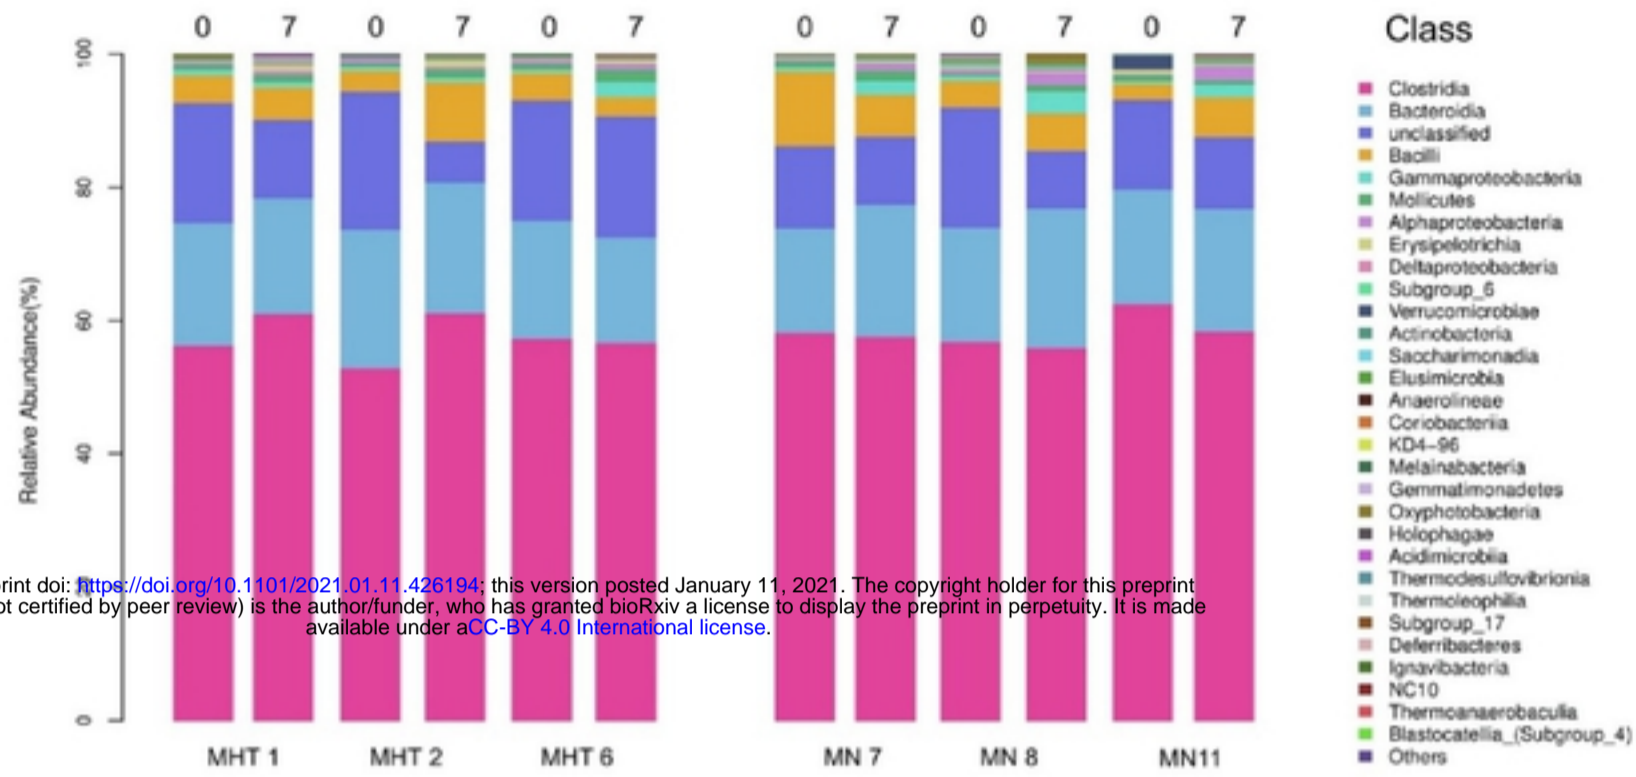

**B**

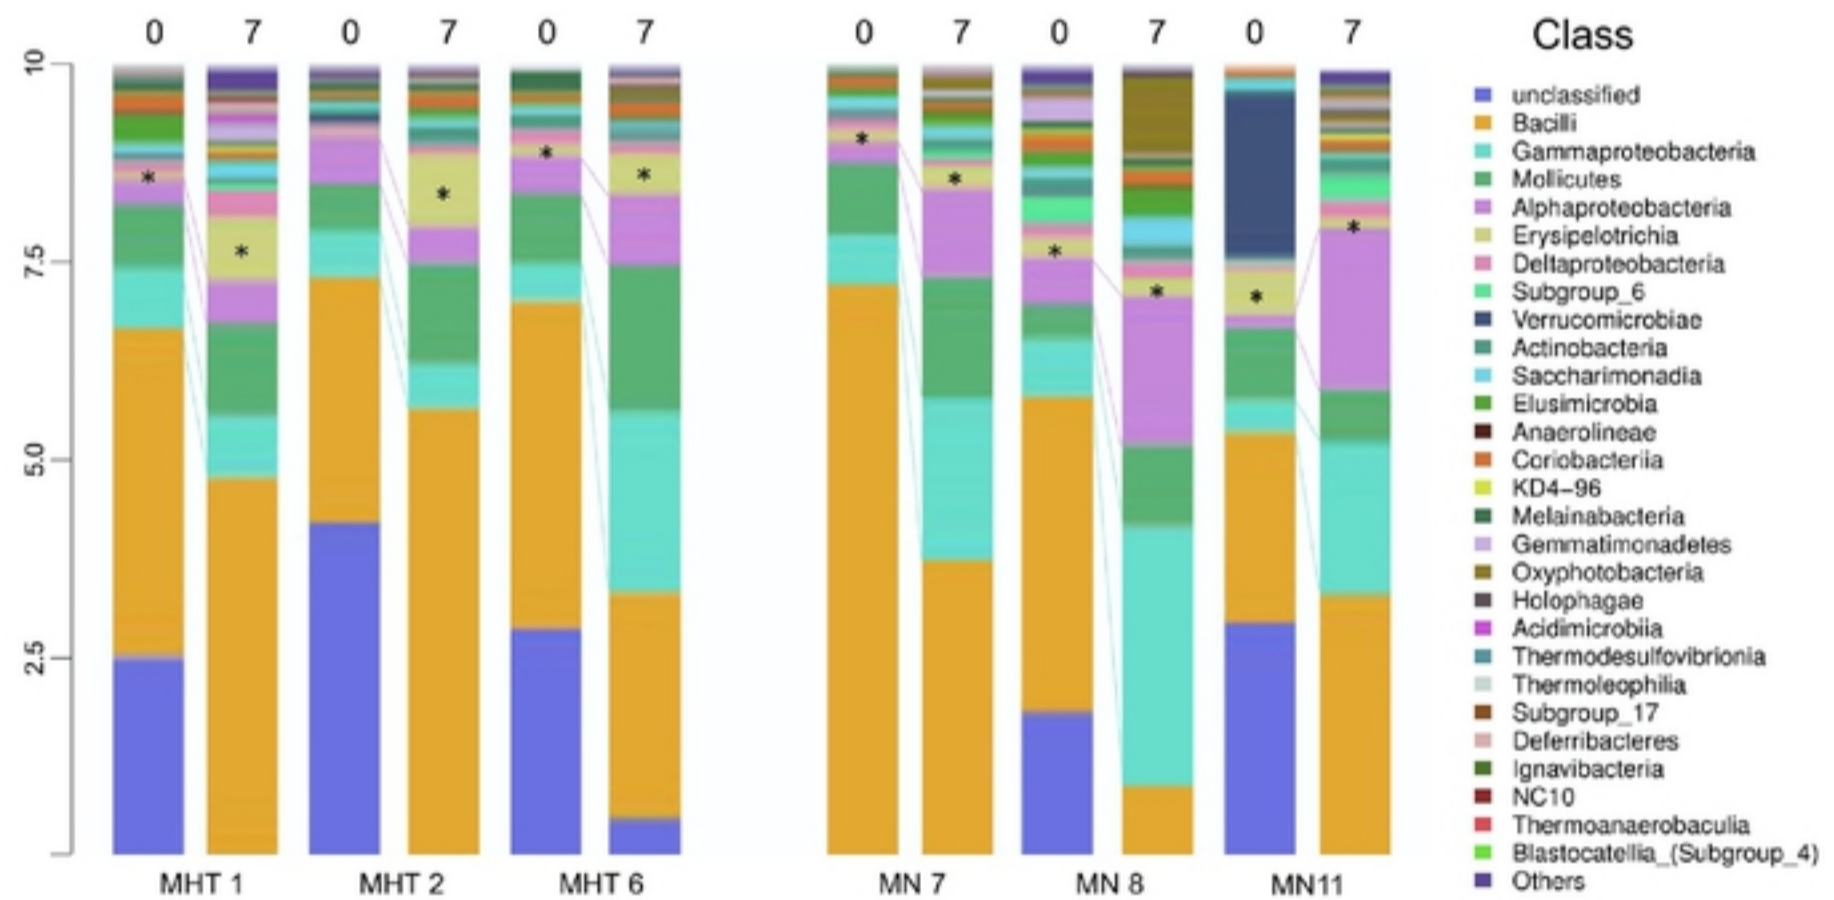

Figure 4
